# Supplementary material for: Transcriptome-wide identification and expression profiling of the ERF gene family suggest roles as transcriptional activators and repressors of fruit ripening in durian
Source: PLOS journal article supplement (doi:10.1371/journal.pone.0252367), 2021-08-10
Supplement: S2 (10.1371/journal.pone.0252367.s002) [file journal.pone.0252367.s002]

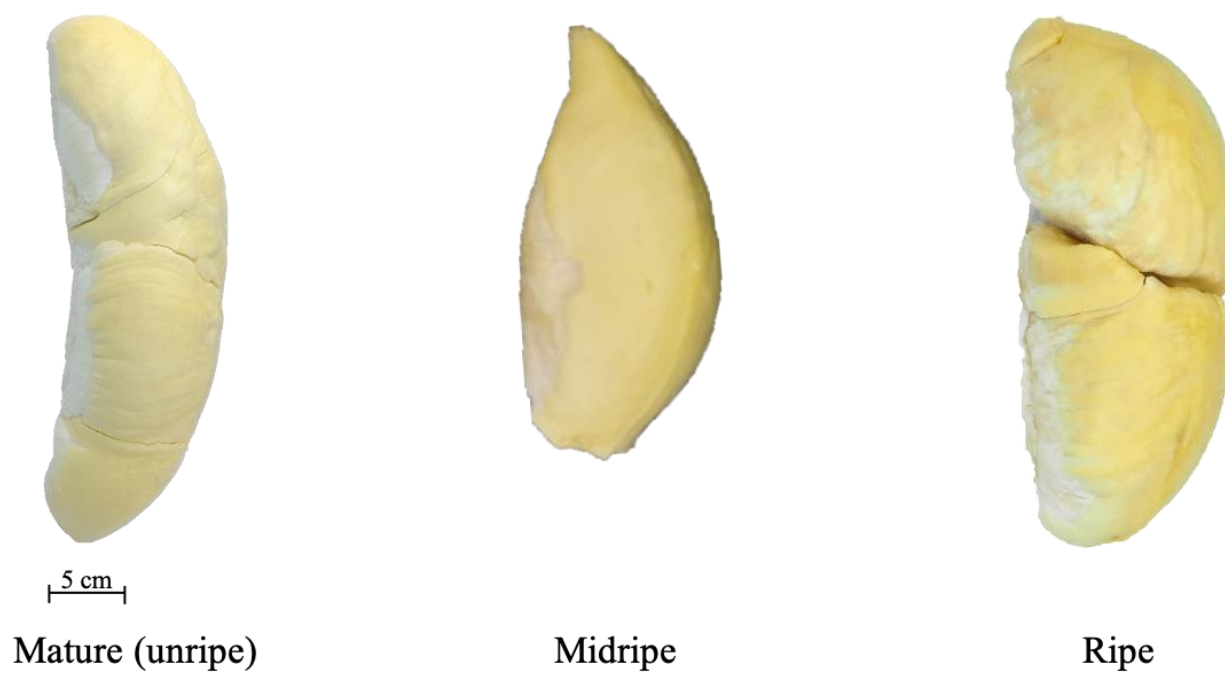

**S1 Fig. Photos of durian pulp samples.** Representative photos of three types of durian pulp samples (mature (unripe), midripe (~3 days after harvest), and ripe (~5 days after harvest)) during post-harvest ripening used in our study.
