# Supplementary material for: Transcriptome-wide identification and expression profiling of the ERF gene family suggest roles as transcriptional activators and repressors of fruit ripening in durian
Source: PLOS journal article supplement (doi:10.1371/journal.pone.0252367), 2021-08-10
Supplement: S4 (10.1371/journal.pone.0252367.s004) [file journal.pone.0252367.s004]

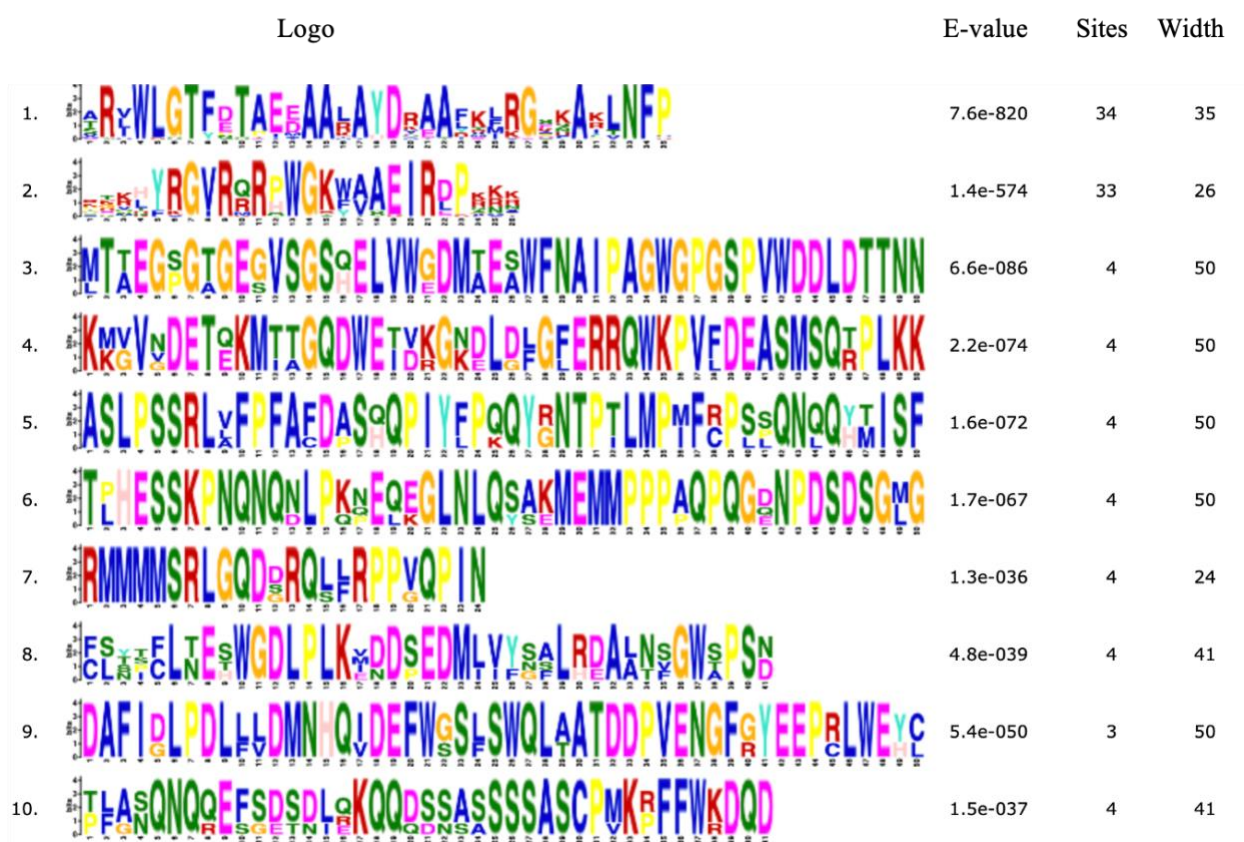

**S3 Fig. Multilevel consensus sequences identified by MEME.** Protein sequences of ripening-associated DzERFs were used to identify conserved motifs. Ten conserved motifs were identified. Motifs 1 and 2 represent the conserved DNA binding domain (AP2/ERF domain) always observed at the N-terminus.
